# Supplementary material for: Black Truffle Aroma Evaluation: SPME-GC-MS vs. Sensory Experts
Source: MDPI journal article supplement (doi:10.3390/foods13060837), 2024-03-09

## Supplementary material

### Black truffle aroma evaluation: SPME-GC-MS vs sensory experts

**Eva Tejedor-Calvo<sup>1,2,\*</sup>** (etejedorc@aragon.es), **Sergi García-Barreda<sup>1,2</sup>**, **Sergio Sánchez<sup>1,2</sup>**, **María Ángeles Sanz<sup>2,3</sup>**, **Pedro Marco<sup>1,2</sup>**

<sup>1</sup> Department of Plant Science, Agrifood Research and Technology Centre of Aragon (CITA), Av. Montañana, 930, 50059 Zaragoza, Spain

<sup>2</sup> Agrifood Institute of Aragón – IA2 (University of Zaragoza – CITA), 50018 Zaragoza, Spain

<sup>3</sup> Laboratories and Technological Assistance, Agrifood Research and Technology Centre of Aragon (CITA), Avda. Montañana, 50059 Zaragoza, Spain

**Table S1.** Attributes selected for visual phase in the sensory analysis. Values (low, medium, high) correspond to 1, 5 and 9 in a 9-point scale.

| Attributes                                    | Low                                         | Medium                      | High                         |
|-----------------------------------------------|---------------------------------------------|-----------------------------|------------------------------|
| Firmness                                      | Gummy, Sagging                              | Slight springiness          | Optimal truffle firmness     |
| Shape                                         | Irregular shape                             | Ovoid                       | Round                        |
| Uniformity                                    | Heterogenous, many, tall lobules            | Few, small lobules          | Homogeneous, without lobules |
| Peridium color                                | Red                                         | -                           | Black                        |
| Peridium shape                                | Heterogenous                                |                             | Homogeneous                  |
| Gleba color                                   | White, grey                                 | White/grey and black, brown | Black                        |
| Sharpness of the marbled pattern of the gleba | Blurred whitish veins or barely discernible | -                           | Well defined whitish veins   |

**Table S2.** Correlation and *p* value values corresponding to Figure 2C.

| Correlation values |         |          |          |          |          |          |          |          |            |           |           |
|--------------------|---------|----------|----------|----------|----------|----------|----------|----------|------------|-----------|-----------|
|                    | Sulfur  | Black    | Mushroo  | Leather  | Butter   | Fermente | Nuts     | Straw    | Equilibriu | Intensity | Complexit |
| <b>Sulfur</b>      | 1       | 0.58363  | -0.30722 | -0.48058 | 0.3695   | -0.234   | -0.14513 | -0.28825 | 0.27547    | 0.25925   | 0.082008  |
| <b>Black</b>       | 0.58363 | 1        | -0.15112 | -0.25291 | 0.1953   | -0.28912 | -0.21345 | -0.20865 | 0.33341    | 0.25466   | 0.26105   |
| <b>Mushroom</b>    | -       | -0.15112 | 1        | 0.5446   | -0.25375 | 0.21707  | 0.11094  | 0.23556  | -0.15017   | -         | -0.12709  |
| <b>Leather</b>     | -       | -0.25291 | 0.5446   | 1        | -0.36064 | 0.23687  | 0.17616  | 0.31447  | -0.086114  | -         | -0.029359 |
| <b>Butter</b>      | 0.3695  | 0.1953   | -0.25375 | -0.36064 | 1        | -0.13413 | 0.12739  | -0.12345 | 0.16326    | 0.033846  | 0.021154  |
| <b>Fermented</b>   | -0.234  | -0.28912 | 0.21707  | 0.23687  | -0.13413 | 1        | 0.20945  | 0.32796  | 0.081879   | 0.074202  | 0.090968  |

|                   |               |              |                |                |               |                 |             |              |                   |                  |                  |
|-------------------|---------------|--------------|----------------|----------------|---------------|-----------------|-------------|--------------|-------------------|------------------|------------------|
| <b>Nuts</b>       | -             | -0.21345     | 0.11094        | 0.17616        | 0.12739       | 0.20945         | 1           | 0.18134      | 0.080682          | -                | -                |
| <b>Straw</b>      | -             | -0.20865     | 0.23556        | 0.31447        | -0.12345      | 0.32796         | 0.18134     | 1            | 0.072489          | -                | 0.11744          |
| <b>Equilibriu</b> | 0.27547       | 0.33341      | -0.15017       | -              | 0.16326       | 0.081879        | 0.080682    | 0.072489     | 1                 | 0.16923          | 0.38545          |
| <b>Intensity</b>  | 0.25925       | 0.25466      | -0.006201      | -              | 0.033846      | 0.074202        | -0.047676   | -0.039719    | 0.16923           | 1                | 0.47168          |
| <b>Complexit</b>  | 0.08200       | 0.26105      | -0.12709       | -              | 0.021154      | 0.090968        | -           | 0.11744      | 0.38545           | 0.47168          | 1                |
| <b>p-value</b>    |               |              |                |                |               |                 |             |              |                   |                  |                  |
|                   | <b>Sulfur</b> | <b>Black</b> | <b>Mushroo</b> | <b>Leather</b> | <b>Butter</b> | <b>Fermente</b> | <b>Nuts</b> | <b>Straw</b> | <b>Equilibriu</b> | <b>Intensity</b> | <b>Complexit</b> |
| <b>Sulfur</b>     | NA            | 0            | 1.04E-07       | 0              | 9.55E-11      | 6.08E-05        | 0.013688    | 6.48E-07     | 2.07E-06          | 8.31E-06         | 0.16513          |
| <b>Black</b>      | 0             | NA           | 0.010221       | 1.40E-05       | 0.0008620     | 5.97E-07        | 0.0002634   | 0.0003640    | 6.62E-09          | 1.21E-05         | 7.16E-06         |
| <b>Mushroom</b>   | 1.04E-        | 0.010221     | NA             | 0              | 1.31E-05      | 0.0002055       | 0.060052    | 5.41E-05     | 0.010713          | 0.91655          | 0.031066         |
| <b>Leather</b>    | 0             | 1.40E-05     | 0              | NA             | 2.84E-10      | 4.90E-05        | 0.0026989   | 4.97E-08     | 0.14491           | 0.62377          | 0.61977          |
| <b>Butter</b>     | 9.55E-        | 0.0008620    | 1.31E-05       | 2.84E-10       | NA            | 0.022809        | 0.030677    | 0.03626      | 0.0054838         | 0.56729          | 0.72073          |
| <b>Fermented</b>  | 6.08E-        | 5.97E-07     | 0.0002055      | 4.90E-05       | 0.022809      | NA              | 0.0003450   | 1.20E-08     | 0.1658            | 0.2093           | 0.1235           |
| <b>Nuts</b>       | 0.01368       | 0.0002634    | 0.060052       | 0.002698       | 0.030677      | 0.0003450       | NA          | 0.002003     | 0.1721            | 0.42023          | 0.91334          |
| <b>Straw</b>      | 6.48E-        | 0.0003640    | 5.41E-05       | 4.97E-08       | 0.03626       | 1.20E-08        | 0.002003    | NA           | 0.22003           | 0.50197          | 0.046461         |
| <b>Equilibriu</b> | 2.07E-        | 6.62E-09     | 0.010713       | 0.14491        | 0.0054838     | 0.1658          | 0.1721      | 0.22003      | NA                | 0.003973         | 1.23E-11         |
| <b>Intensity</b>  | 8.31E-        | 1.21E-05     | 0.91655        | 0.62377        | 0.56729       | 0.2093          | 0.42023     | 0.50197      | 0.0039735         | NA               | 0                |
| <b>Complexit</b>  | 0.16513       | 7.16E-06     | 0.031066       | 0.61977        | 0.72073       | 0.1235          | 0.91334     | 0.046461     | 1.23E-11          | 0                | NA               |

**Table S3.** VOCs odor and the possible relation with the sensory attributes.

| <b>Name</b>             | <b>CAS</b> | <b>Odor*</b>                 | <b>Attribute selected by the trained panel</b> |
|-------------------------|------------|------------------------------|------------------------------------------------|
| Ethanol                 | 64-17-5    | sweet                        | ni                                             |
| Dimethyl sulfide        | 75-18-3    | cabbage, sulfur, gasoline    | sulfur; black olives                           |
| 1-propanol              | 71-23-8    | alcohol, pungent             | fermentation                                   |
| Propanal-2-methyl       | 78-84-2    | pungent, malt, green         | fermentation                                   |
| Butanal                 | 123-72-8   | pungent, green               | ni                                             |
| 3-methyl-2-butanone     | 563-80-4   | camphor                      | leather                                        |
| 2-butanone              | 78-93-3    | ether                        | ni                                             |
| 2-methyl-1-propanol     | 78-83-1    | wine, solvent, bitter        | fermentation                                   |
| butanal-3-methyl        | 590-86-3   | malt                         | fermentation                                   |
| butanal-2-methyl        | 96-17-3    | cocoa, almond                | nuts                                           |
| 2-pentanone             | 107-87-9   | ether, fruit                 | ni                                             |
| Pentanal                | 110-62-3   | almond, malt, pungent        | nuts; fermentation                             |
| 3-methyl-1-butanol      | 123-51-3   | whiskey, malt, burnt         | fermentation                                   |
| 2-methyl-1-butanol      | 137-32-6   | wine, onion                  | fermentation                                   |
| Dimethyl-disulfide      | 624-92-0   | onion, cabbage, black olives | sulfur; black olives                           |
| Isobutylacetate         | 110-19-0   | fruit, apple, banana         | ni                                             |
| Hexanal                 | 66-25-1    | grass, tallow, fat           | straw                                          |
| ethyl-2-methylbutanoate | 7452-79-1  | apple                        | ni                                             |
| ethyl-3-methylbutanoate | 108-64-5   | fruit                        | ni                                             |
| Hexanol                 | 111-27-3   | resin, flower, green         | ni                                             |
| Isoamylacetate          | 123-92-2   | banana                       | ni                                             |
| 2-methyl-butyl-acetate  | 624-41-9   | fruit                        | ni                                             |
| Heptanal                | 111-71-7   | fat, citrus, rancid          | butter                                         |
| Methional               | 3268-49-3  | cooked potato                | ni                                             |
| Benzaldheyde            | 100-52-7   | almond, burnt sugar          | nuts                                           |
| 1-heptanol              | 111-70-6   | chemical, green              | straw                                          |
| 1-octen-3-ol            | 3391-86-4  | mushroom                     | mushroom                                       |

|                     |           |                           |                |
|---------------------|-----------|---------------------------|----------------|
| 3-octanone          | 106-68-3  | herb, butter, resin       | butter         |
| 3-octanol           | 589-98-0  | moss, nut, mushroom       | mushroom; nuts |
| Octanal             | 124-13-0  | fat, soap, lemon, green   | butter         |
| 2-ethyl-1-hexanol   | 104-76-7  | rose, green               | ni             |
| Benzeneacetaldehyde | 122-78-1  | hawthorne, honey, sweet   | ni             |
| 1-octanol           | 111-87-5  | chemical, metal, burnt    | ni             |
| E-2-octenal         | 2548-87-0 | green, nut, fat           | nuts           |
| 3-methyl-phenol     | 108-39-4  | fecal, plastic            | leather        |
| 2-nonanone          | 821-55-6  | hot milk, soap, green     | ni             |
| Nonanal             | 124-19-6  | fat, citrus, green        | ni             |
| Benzeneethanol      | 60-12-8   | honey, spice, rose, lilac | ni             |
| caprylic acid       | 124-07-2  | sweat, cheese             | butter         |
| ethyl caprylate     | 106-32-1  | fruit, fat                | butter         |
| 2,4-nonadienal      | 5910-87-2 | fat, wax, green           | butter         |
| nonanoic acid       | 112-05-0  | green, fat                | butter         |
| 2-undecanone        | 112-12-9  | orange, fresh, green      | ni             |

---

ni – not identified

\* Odor data was reported by flavornet website and some authors (Campo et al., 2017; Culleré et al., 2017; Tejedor-Calvo et al., 2021; Tejedor-Calvo, García-Barreda, et al., 2023).

**Figure S1.** Tucker-1 plot for attributes: A) sulfur; B) black olives; C) mushroom; D) leather. Samples correspond to those truffles for training (more data shown in Figure 3). The points outer the circumference does not explain 100% of the data variance for the attribute model.

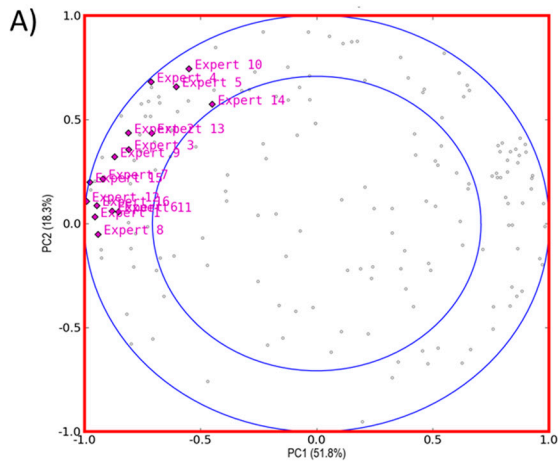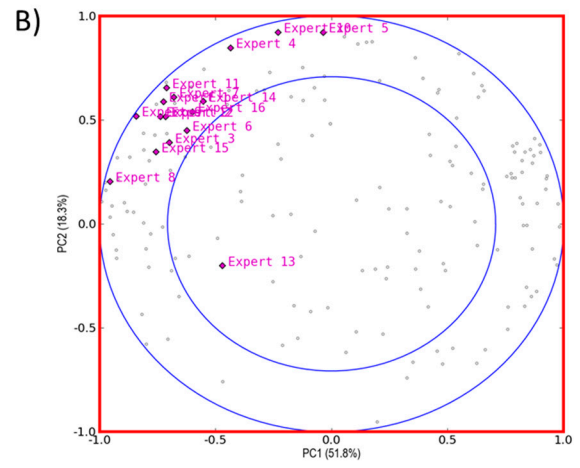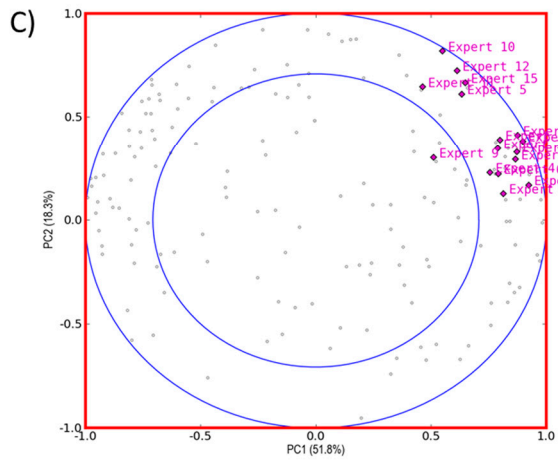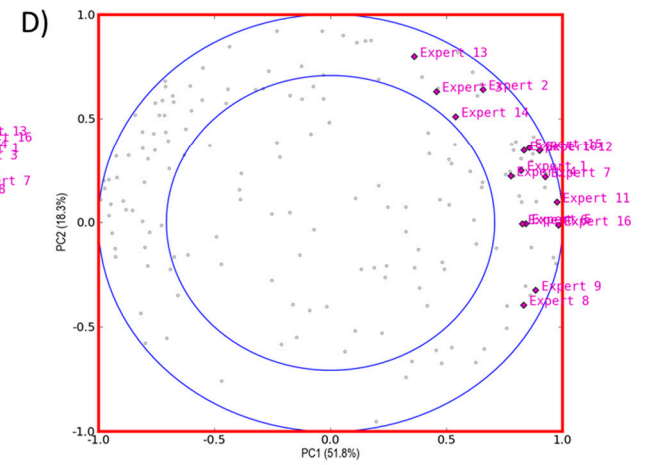

Supplement: s1 [file s1]
